# Supplementary material for: Antifibrosis Efficacy of Apo-9-Fucoxanthinone-Contained Sargassum horneri Ethanol Extract on Nasal Polyp: An In Vitro and Ex Vivo Organ Culture Assay
Source: MDPI journal article supplement (doi:10.3390/cimb44110395), 2022-11-21
Supplement: s1 [file s1]

# Antifibrosis efficacy of Apo-9-fucoanthinone-contained *Sargassum horneri* ethanol extract on nasal polyp: an *in vitro* and *ex vivo* organ culture assay

Mi-Jin Yim<sup>1</sup>, Jeong Min Lee<sup>1</sup>, Seok-Chun Ko<sup>1</sup>, Hyun-Soo Kim<sup>1</sup>, Ji-Yul Kim<sup>1</sup>, Seong Kook Park<sup>2, 1</sup>, Dae-Sung Lee<sup>1,\*</sup> and Il-Whan Choi<sup>3,\*</sup>

<sup>1</sup> National Marine Biodiversity Institute of Korea, Seochon, Chungcheongnam-do 33662, Republic of Korea

<sup>2</sup> Department of Otorhinolaryngology-Head & Neck Surgery, Inje University College of Medicine, Busan Paik Hospital, Busan 47392, Republic of Korea

<sup>3</sup> Department of Microbiology and Immunology, College of Medicine Inje University, Busan 47392, Republic of Korea

\* Correspondence: cihima@inje.ac.kr; daesung@mabik.re.kr

## List of Figure

**Figure S1.** Mass spectra of the Apo-9 fucoxanthinone isolated from *Sargassum horneri*.

## HPLC-DAD-ESI/MS analysis of Apo-9-fucoanthinone

HPLC-DAD-ESI/MS was progressed using the assay described by Kim et al. [Reference 1]. The analysis was carried out using an HPLC-DAD system (Hewlett-Packard, Waldbronn, Germany) coupled with a Finnigan MAT LAW ion-trap mass spectrometer (ESI/MS, Finnigan MAT, San Jose, CA, USA). The positive ion mass spectra were recorded in the range  $m/z$  100-2000. The source voltage was set to 5 kV while the capillary temperature was 275 °C. The capillary voltage was maintained at 36.5 V; inter-octapole lens voltage was at 10 V; sheath gas 80 psi (551.6 kPa); and auxiliary gas, 20 psi (137.9 kPa).

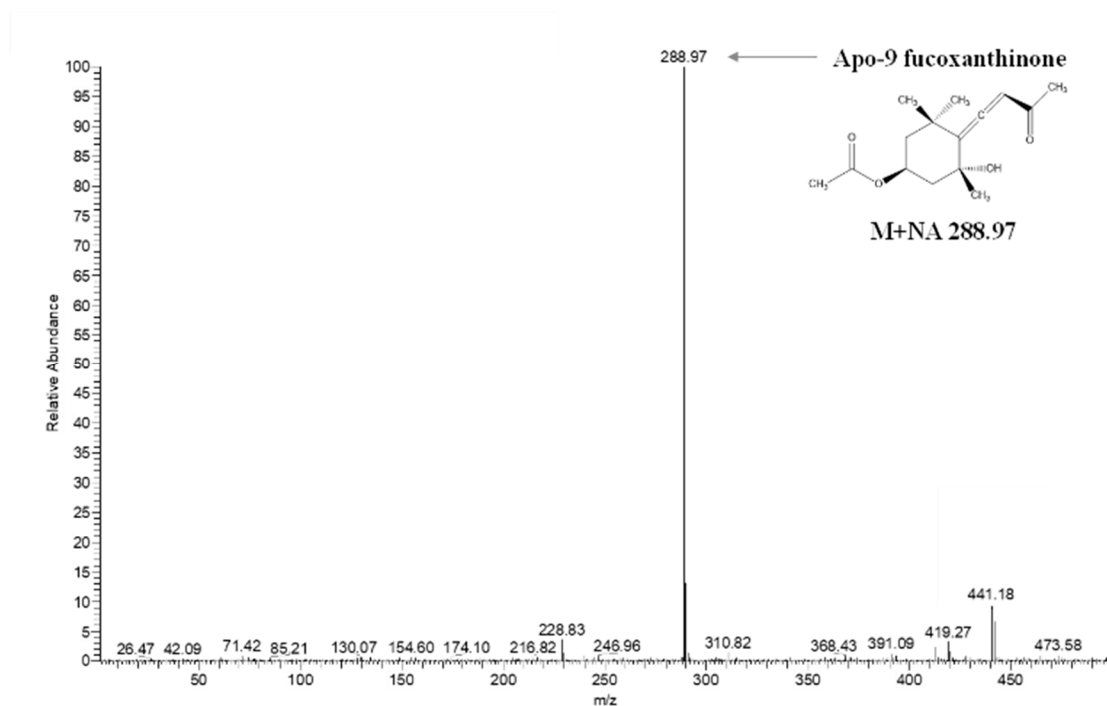

**Figure S1.** Mass spectra of the Apo-9 fucoxanthinone isolated from *Sargassum horneri*. The major peak in *Sargassum horneri* extract was determined to Apo-9-fucoxanthinone by LC-DAD-ESI/MS. The molecular weight of Apo-9-fucoxanthinone is identified as 265 Da.

## Reference

- Kim, H.-S.; Wang, L.; Jayawardena, T.U.; Kim, E.A.; Heo, S.J.; Shanura, I.P.S.; Lee, J.H.; Jeon, Y.J. High-performance centrifugal partition chromatography (HPCPC) for efficient isolation of diphlorethohydroxycarmalol (DPHC) and screening of its antioxidant activity in a zebrafish model. *Process Biochem.* **2020**, *88*, 189–196. doi: 10.1016/j.procbio.2019.09.027.
